# Supplementary material for: Solid-phase microextraction using a β-ketoenamine-linked covalent organic framework coating for efficient enrichment of synthetic musks in water samples
Source: Royal Society of Chemistry journal article supplement (doi:10.1039/c9ay02755f), 2020-01-01
Supplement: c9ay02755f1.pdf [file c9ay02755f1.pdf]

# Solid-phase microextraction based on $\beta$ -ketoenamine-linked covalent organic framework coating for efficient enrichment of synthetic musks in water samples

Lian Wen<sup>a, b, c</sup>, Peng Wua<sup>a\*</sup>, Lei-Lei Wang<sup>b\*</sup>, Li-Zong Chen<sup>c</sup>, Ming-Lin Wang<sup>a</sup>, Xia Wang<sup>c</sup>,  
Jin-Ming Lin<sup>d</sup>, Ru-Song Zhao<sup>c</sup>

*<sup>a</sup>College of Food Science and Engineering, Shandong Agricultural University, Taian, 271018, China*

*<sup>b</sup>Qilu University of Technology (Shandong Academy of Sciences), Ecology Institute of Shandong Academy of Sciences, Shandong Province Key Laboratory of Applied Microbiology, Jinan, 250014, China*

*<sup>c</sup>Key Laboratory for Applied Technology of Sophisticated Analytical Instruments of Shandong Province, Shandong Analysis and Test Center, Qilu University of Technology (Shandong Academy of Sciences), Jinan, 250014, China*

*<sup>d</sup>Department of Chemistry, Tsinghua University, Beijing, 100084, China*

**\*Correspondence:** Dr. L. Wang, Qilu University of Technology (Shandong Academy of Sciences), Ecology Institute of Shandong Academy of Sciences, Shandong Province Key Laboratory of Applied Microbiology, Jinan, 250014, China, **E-mail:** heat\_33wll@163.com (L. Wang); Dr. P. Wu, College of Food Science and Engineering, Shandong Agricultural University, Taian, 271018, China, **E-mail:** 13954847828@163.com (P. Wu)

---

\* Corresponding author.

E-mail address: heat\_33wll@163.com (L. Wang); 13954847828@163.com (P. Wu)

## Instrumentation

Powder X-ray diffraction (PXRD) patterns were measured with a PANalytical Empyrean diffractometer with Cu K $\alpha$  radiation ( $\lambda=1.5405\text{\AA}$ ), the fourier transform infrared (FT-IR) spectra were recorded (600-4000 cm $^{-1}$  region) on the Nicolet 710 IR spectrometer. Field-emission scanning electron microscopy (FESEM) micrographs were obtained using a SUPRATM 55 microscope (Carl Zeiss Micro Imaging Co., Ltd., Germany). Thermal gravimetric analysis (TGA) were carried out on an STA 449F3-QMS403C system (Netzsch, Germany) in flowing N $_2$  within a temperature range of 25°C to 700°C. Nitrogen adsorption and desorption experiments were performed at 77 K on an ASAP2460 (MICROMERITICS, Atlanta, U.S.A).

## Synthesis of Tp

A mixture of hexamethylenetetramine (7.4 g, 52.5 mmol), dried phloroglucinol (3 g, 23.8 mmol) and trifluoroacetic acid (45 mL) was stirred in preheated oil bath (100 °C) for 2h under inert atmosphere. Then, 3 M HCl was added to the mixture slowly and the mixture was maintained at 100°C for another 1h, followed by cooling to r.t.. After filtration using Celite bed, obtained filtrate was extracted with dichloromethane (4×100 mL), dried over anhydrous Na $_2$ SO $_4$ . After evaporation, the orange colored solid was obtained and repeatedly washed with hot ethanol to get the off-white colored powder (0.8 g, yield: 20%).  $^1\text{H}$  NMR (400 MHz, CDCl $_3$ ):  $\delta$  14.12 (s, 3H, OH), 10.15 (s, 3H, CHO).  $^{13}\text{C}$  NMR (100 MHz, CDCl $_3$ ):  $\delta$  192.2, 173.7, 103.0. MS (EI) m/z 210 (M $^+$ ).

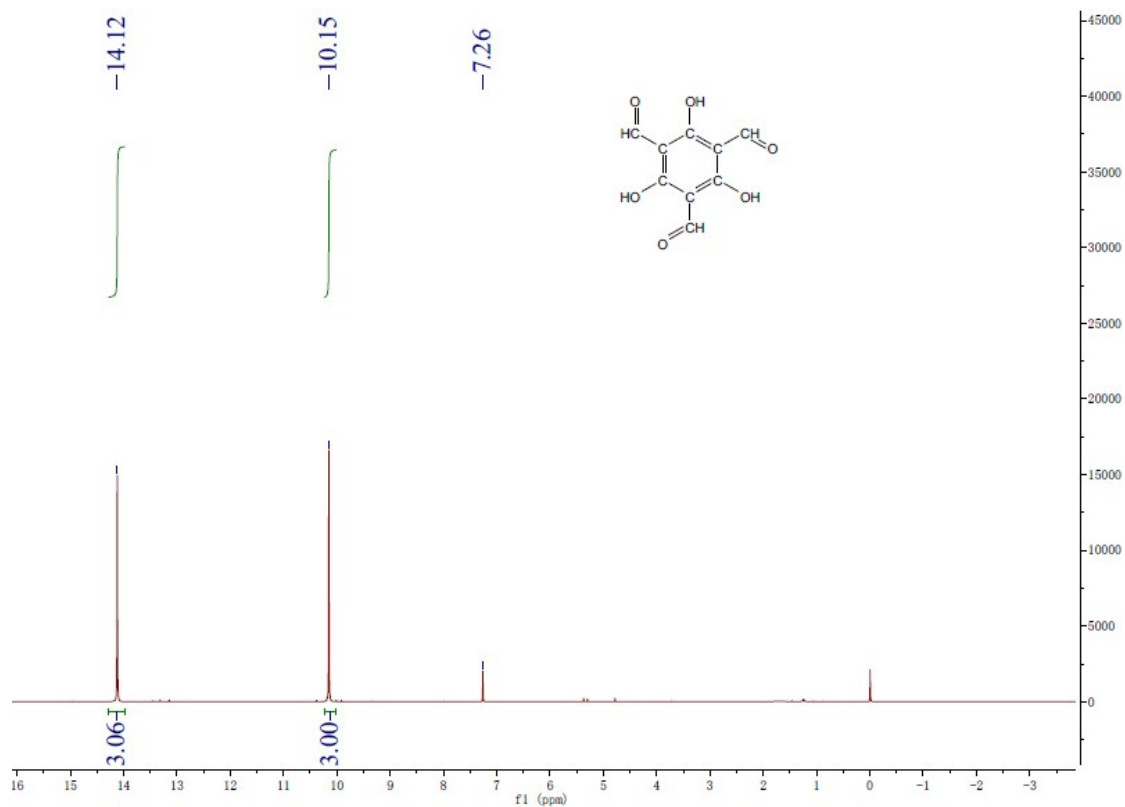

Fig. S1  $^1\text{H}$  NMR spectrum of Tp in  $\text{CDCl}_3$

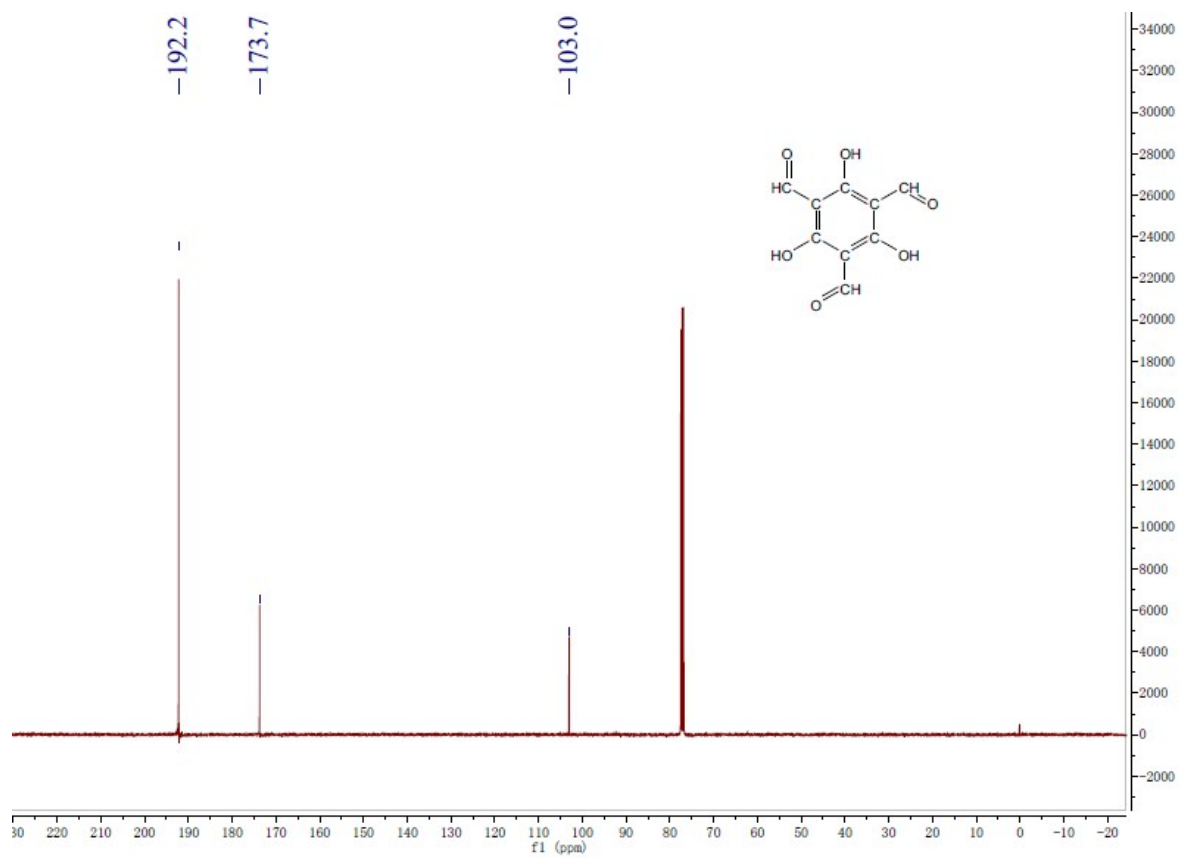

Fig. S2  $^{13}\text{C}$  NMR spectrum of Tp in  $\text{CDCl}_3$

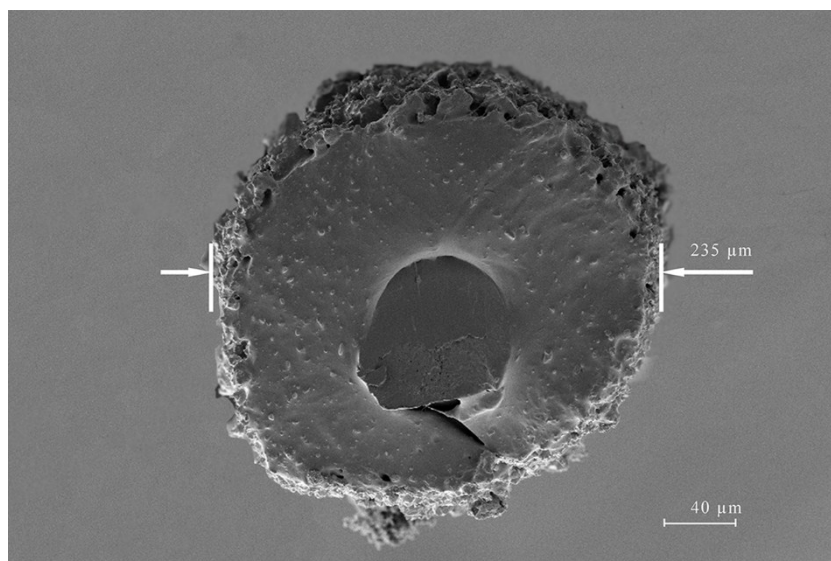

Fig. S3 The cross-sectional SEM images of the TpPa-1-coated fiber.

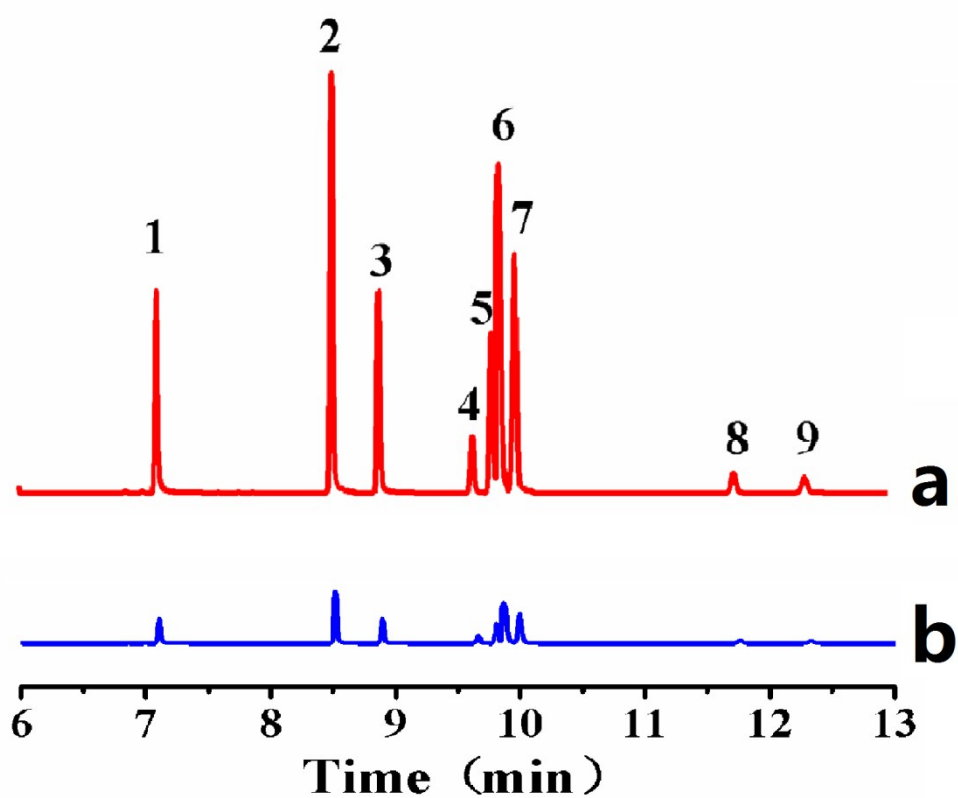

Fig. S4 Chromatograms for the nine synthetic musks (initial concentration =  $1\mu\text{g}\cdot\text{L}^{-1}$ ) after SPME of using TpPa-1-coating (a) and glued coating (b).

**Table S1 Chemical structure, physical–chemical properties and EFs value of synthetic musks.**

| Analytes | Chemical Structure                                                                  | Boiling point (°C) | log $K_{ow}$ | EFs       |
|----------|-------------------------------------------------------------------------------------|--------------------|--------------|-----------|
| ADBI     | 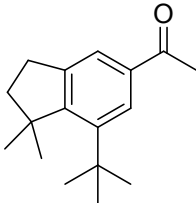   | 309.1              | 6.6          | 5436 ± 15 |
| AHMI     |    | 336.6              | 6.7          | 4791 ± 16 |
| AHTN     |  | 356.8              | 5.7          | 6143 ± 60 |
| ATII     |  | 350                | 8.1          | 6254 ± 7  |
| DPMI     |  | 286.1              | 4.9          | 1214 ± 42 |
| HHCB     |  | 356.8              | 5.9          | 4960 ± 19 |

---

|                  |                                                                                    |                      |     |           |
|------------------|------------------------------------------------------------------------------------|----------------------|-----|-----------|
| Musk<br>ambrette | 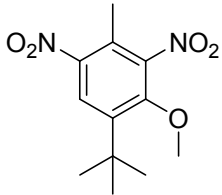  | 369.3                | 5.7 | 12487 ± 9 |
| Musk<br>ketone   |   | 436                  | 4.3 | 6229 ± 24 |
| Musk NN          |  | 138-142<br>(1 mm Hg) | 4.7 | 1642 ± 18 |

---
